# Supplementary material for: Multi-scale instrumental analyses of plasticized polyhydroxyalkanoates (PHA) blended with polycaprolactone (PCL) and the effects of crosslinkers and graft copolymers
Source: Royal Society of Chemistry journal article supplement (doi:10.1039/c8ra10045d), 2019-01-01
Supplement: c8ra10045d1.pdf [file c8ra10045d1.pdf]

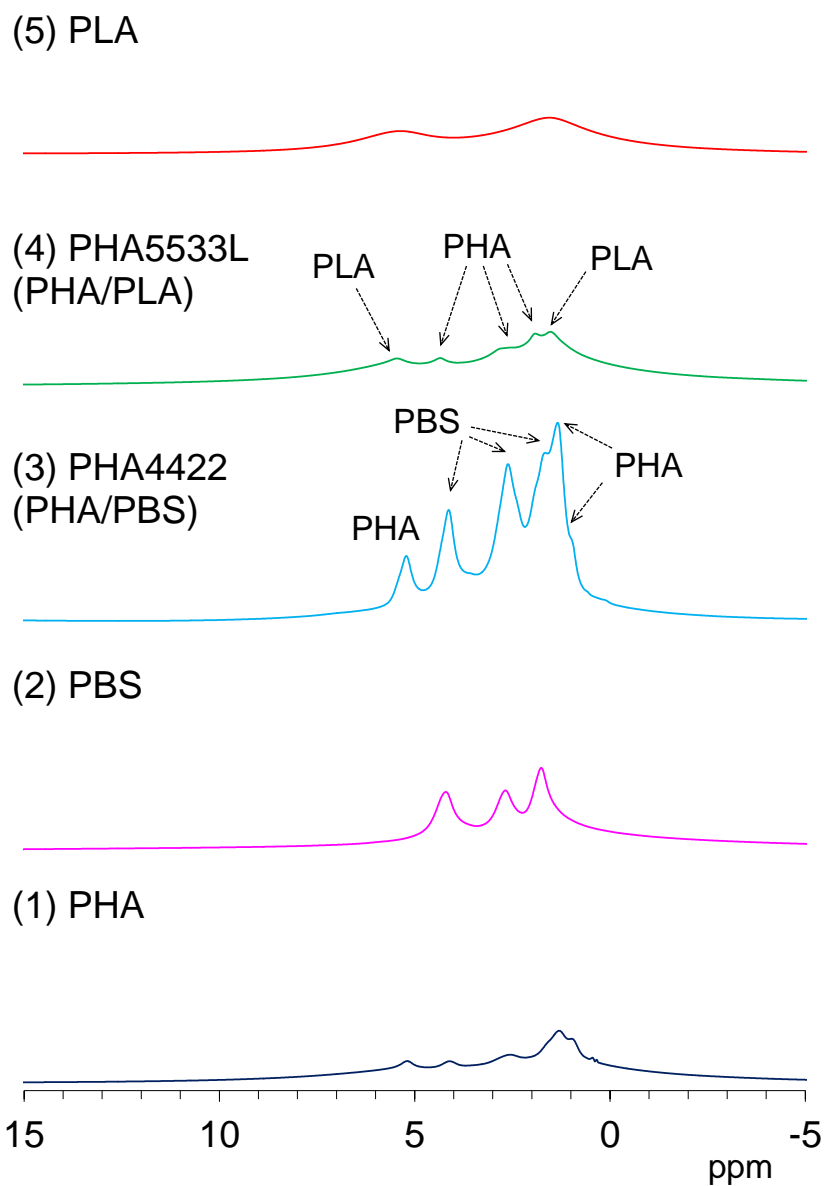

Fig. S1. <sup>1</sup>H MAS NMR spectra of plasticized PHA and constituent polymers.

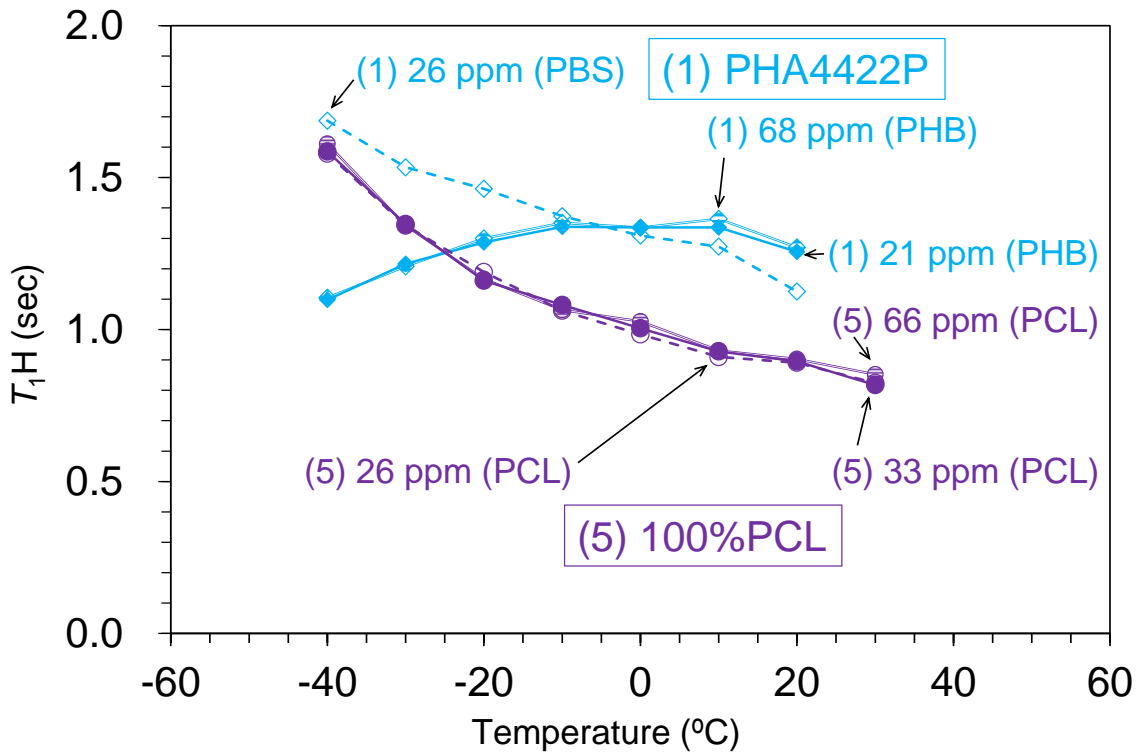

Fig. S2.  $T_{1H}$  changes of plasticized PHA (1) and PCL (5) with rising temperature.

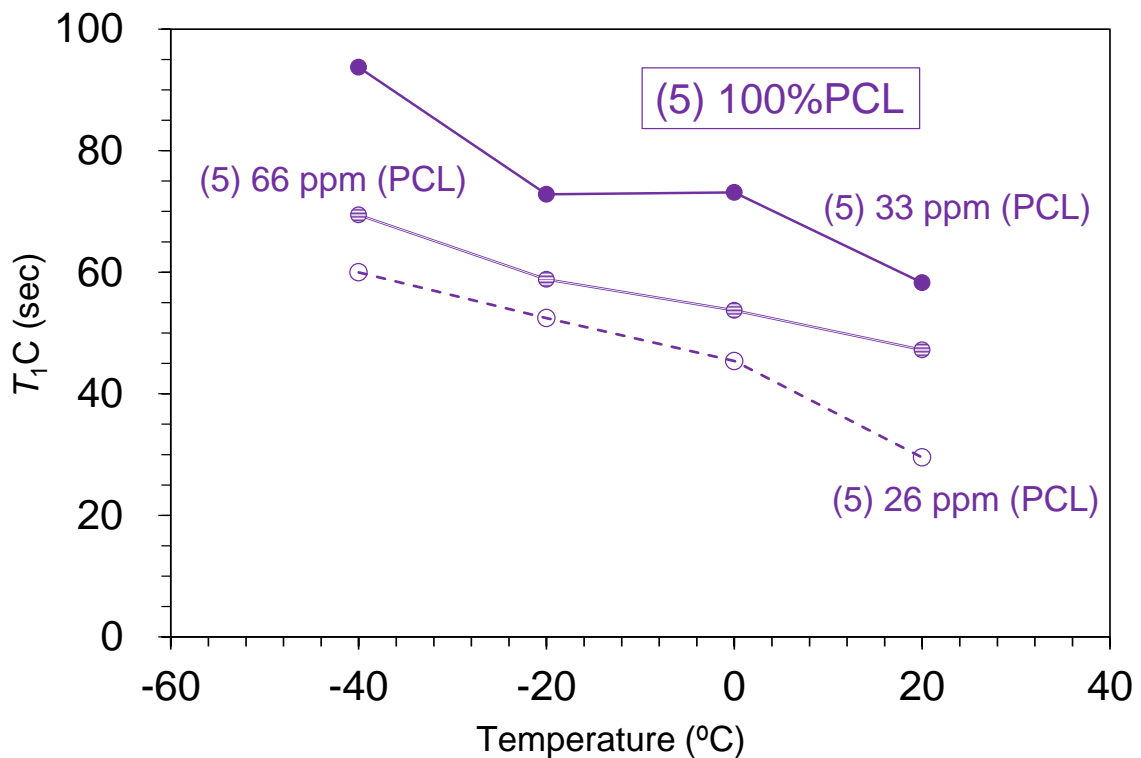

Fig. S3.  $T_{1C}$  changes of PCL (5) with rising temperature.
